# Supplementary material for: Novel Phenothiazine/Donepezil-like Hybrids Endowed with Antioxidant Activity for a Multi-Target Approach to the Therapy of Alzheimer’s Disease
Source: MDPI journal article supplement (doi:10.3390/antiox11091631), 2022-08-23
Supplement: s1 [file s1]

## Supplementary material

### **Novel Phenothiazine/Donepezil-like Hybrids Endowed with Antioxidant Activity for a Multi-Target Approach to the Therapy of Alzheimer's Disease**

Alessia Carocci <sup>1,\*</sup>, Alexia Barbarossa <sup>1,†</sup>, Rosalba Leuci <sup>1,†</sup>, Antonio Carrieri <sup>1</sup>, Leonardo Brunetti <sup>1</sup>, Antonio Laghezza <sup>1</sup>, Marco Catto <sup>1</sup>, Francesco Limongelli <sup>1</sup>, Sílvia Chaves <sup>2</sup>, Paolo Tortorella <sup>1</sup>, Cosimo Damiano Altomare <sup>1</sup>, Maria Amélia Santos <sup>2</sup>, Fulvio Loiodice <sup>1</sup> and Luca Piemontese <sup>1,\*</sup>

<sup>1</sup>

*Department of Pharmacy—Pharmaceutical Sciences, University of Bari Aldo Moro, via E.*

*Orabona 4, 70125 Bari, Italy*

<sup>2</sup>

*Centro de Química Estrutural, Institute of Molecular Sciences, Departamento de Engenharia*

*Química, Instituto Superior Técnico, Universidade de Lisboa, Av. Rovisco Pais 1, 1049-001 Lisboa,*

*Portugal*

\* Corresponding authors: [alessia.carocci@uniba.it](mailto:alessia.carocci@uniba.it); [luca.piemontese@uniba.it](mailto:luca.piemontese@uniba.it)

† These authors contributed equally to this work.

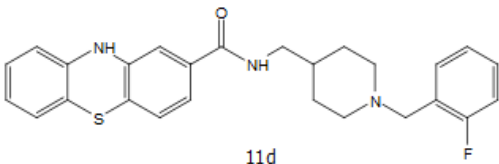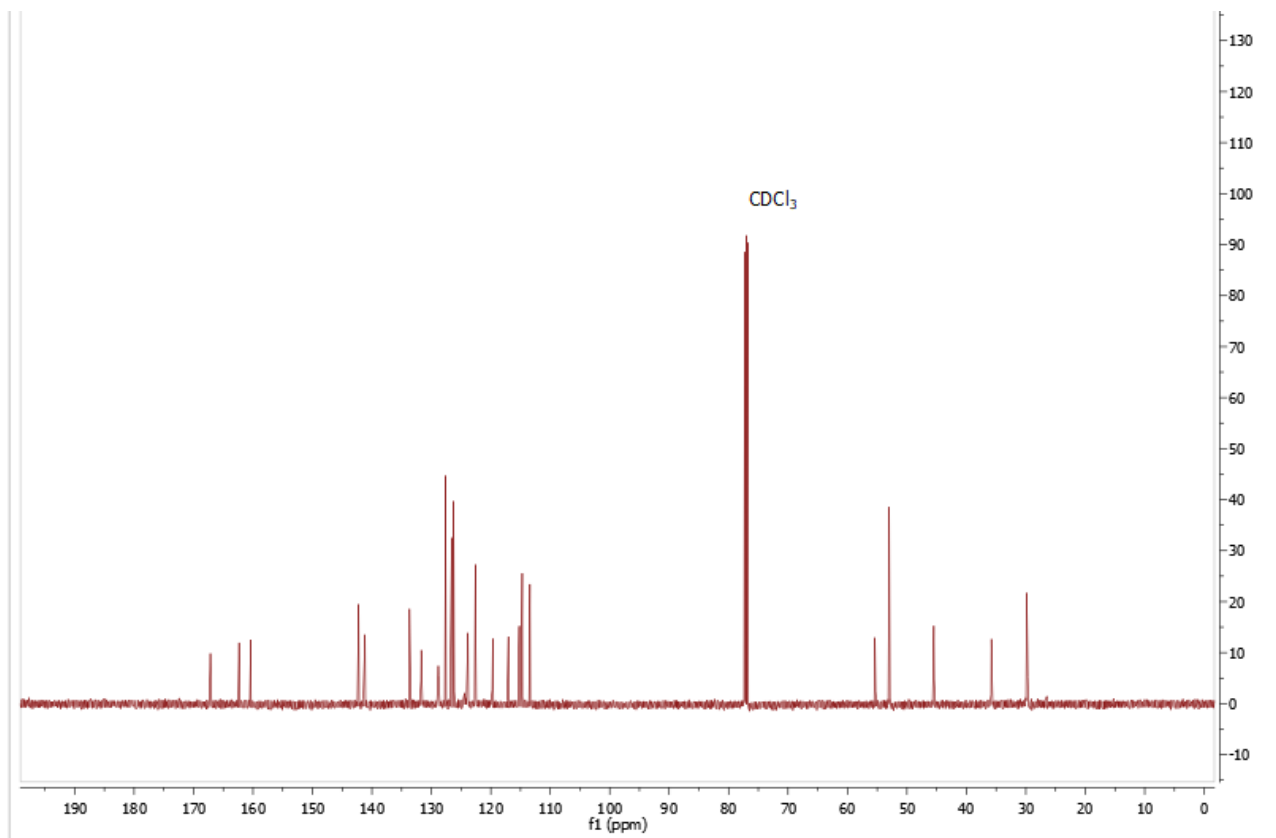

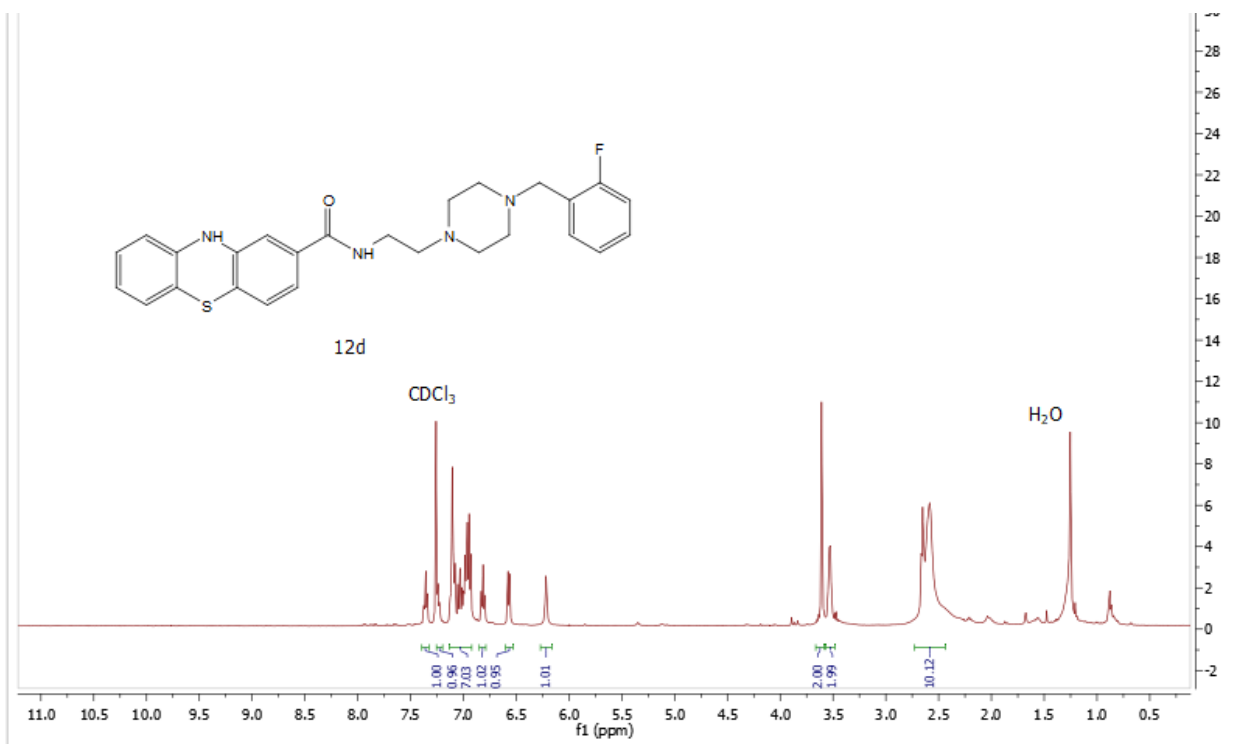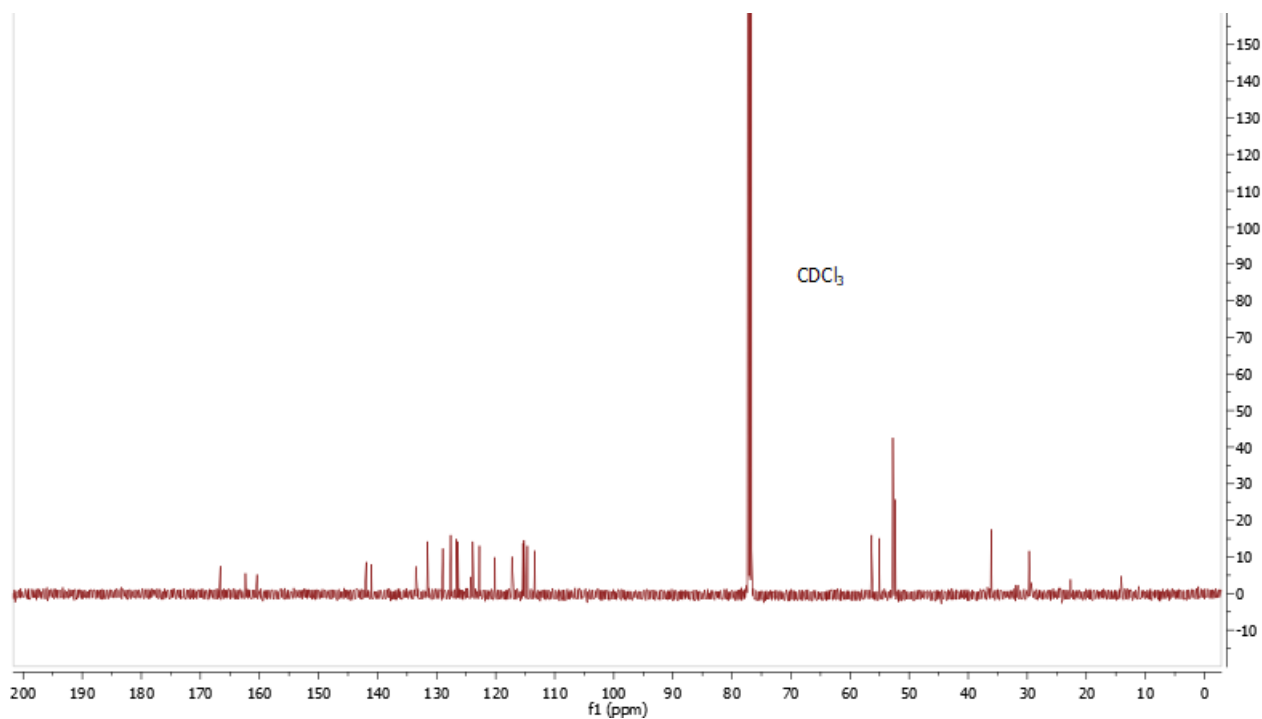

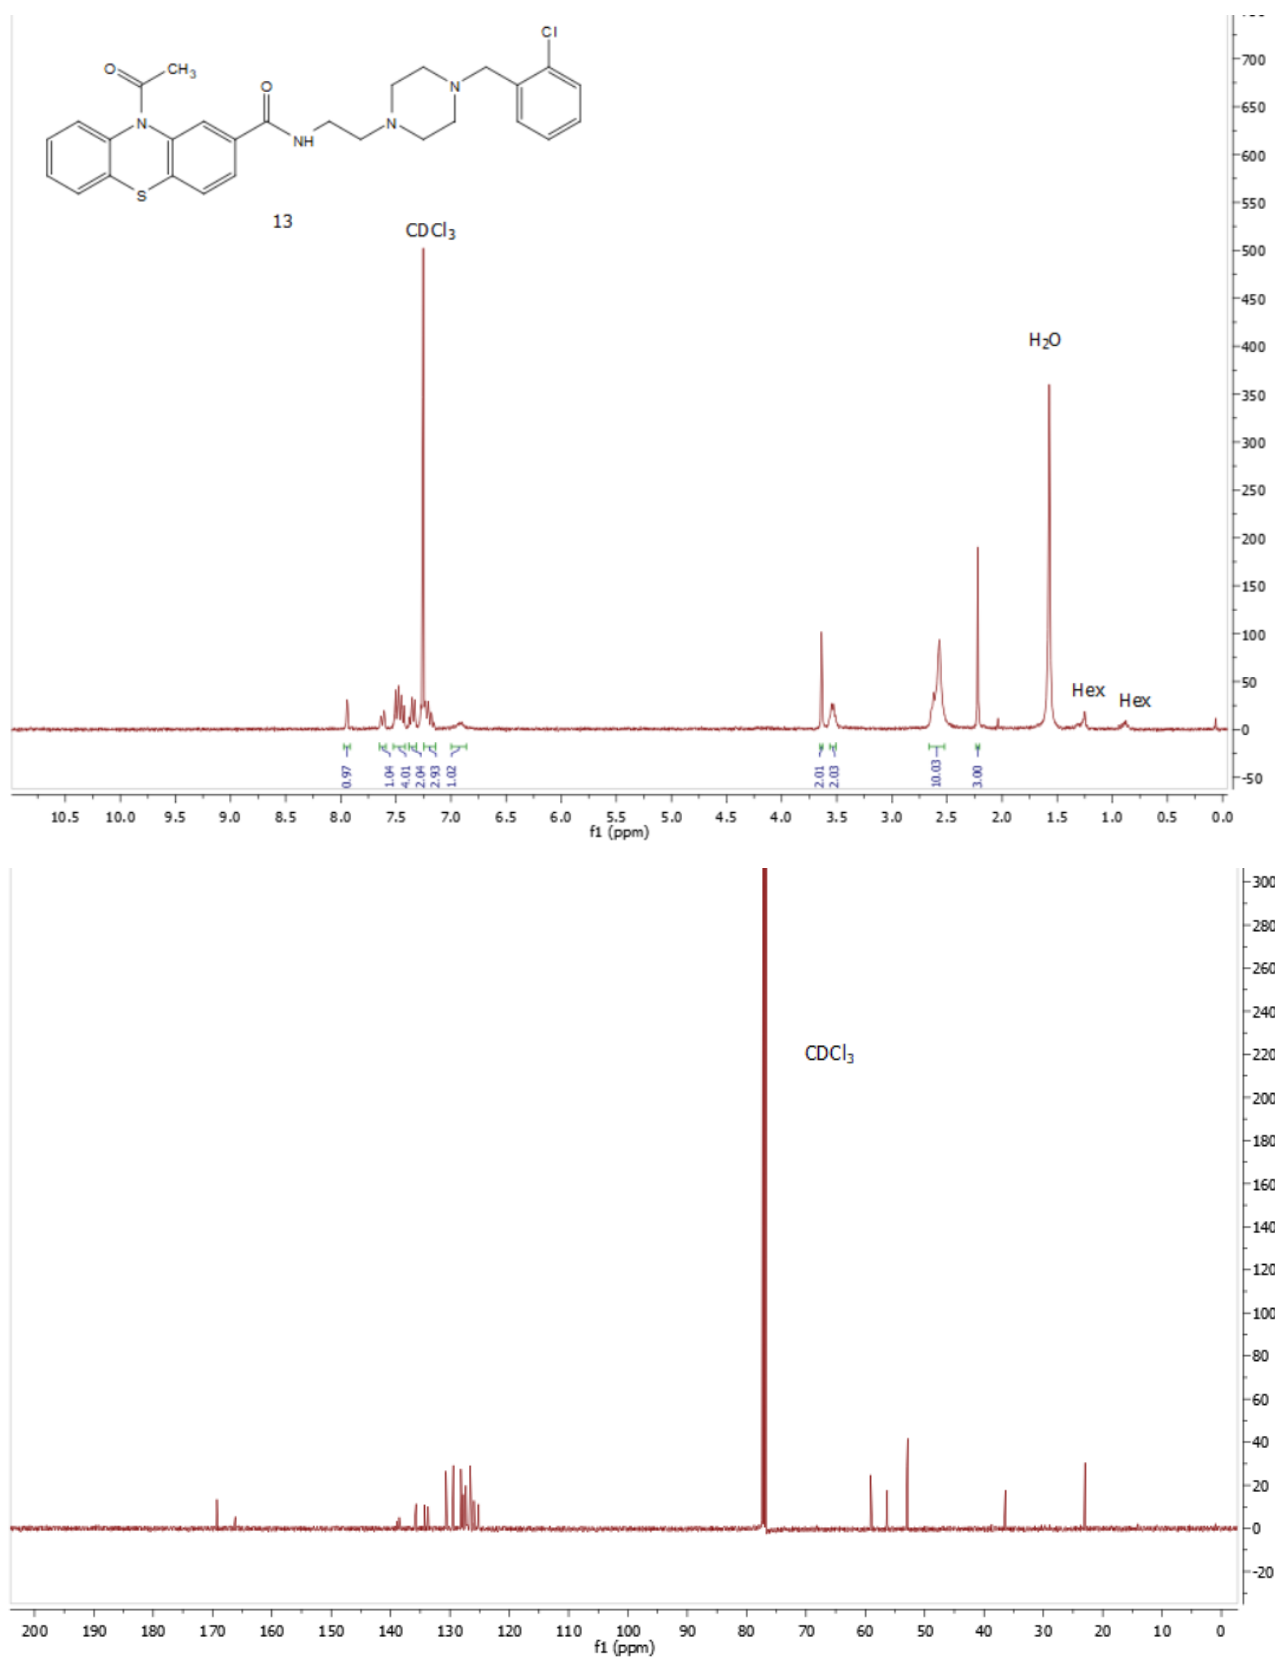

**Figure S1** NMR spectra of selected compounds.

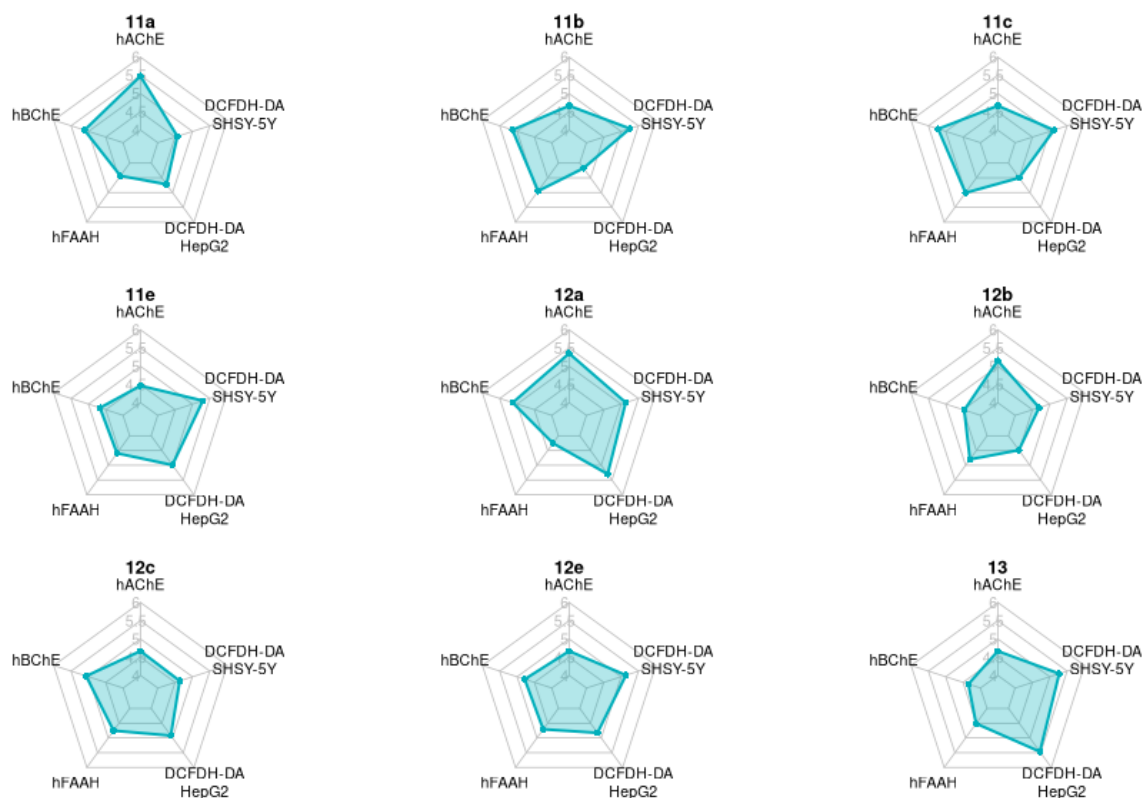

**Figure S2.** Summary chart representing the biological activities of compounds **11a–c**, **11e**, **12a–c**, **12e** and **13**. Data are reported as pIC<sub>50</sub>. If IC<sub>50</sub> was not evaluated the included data was estimated on the basis of the percentage of inhibition at 10  $\mu$ M.

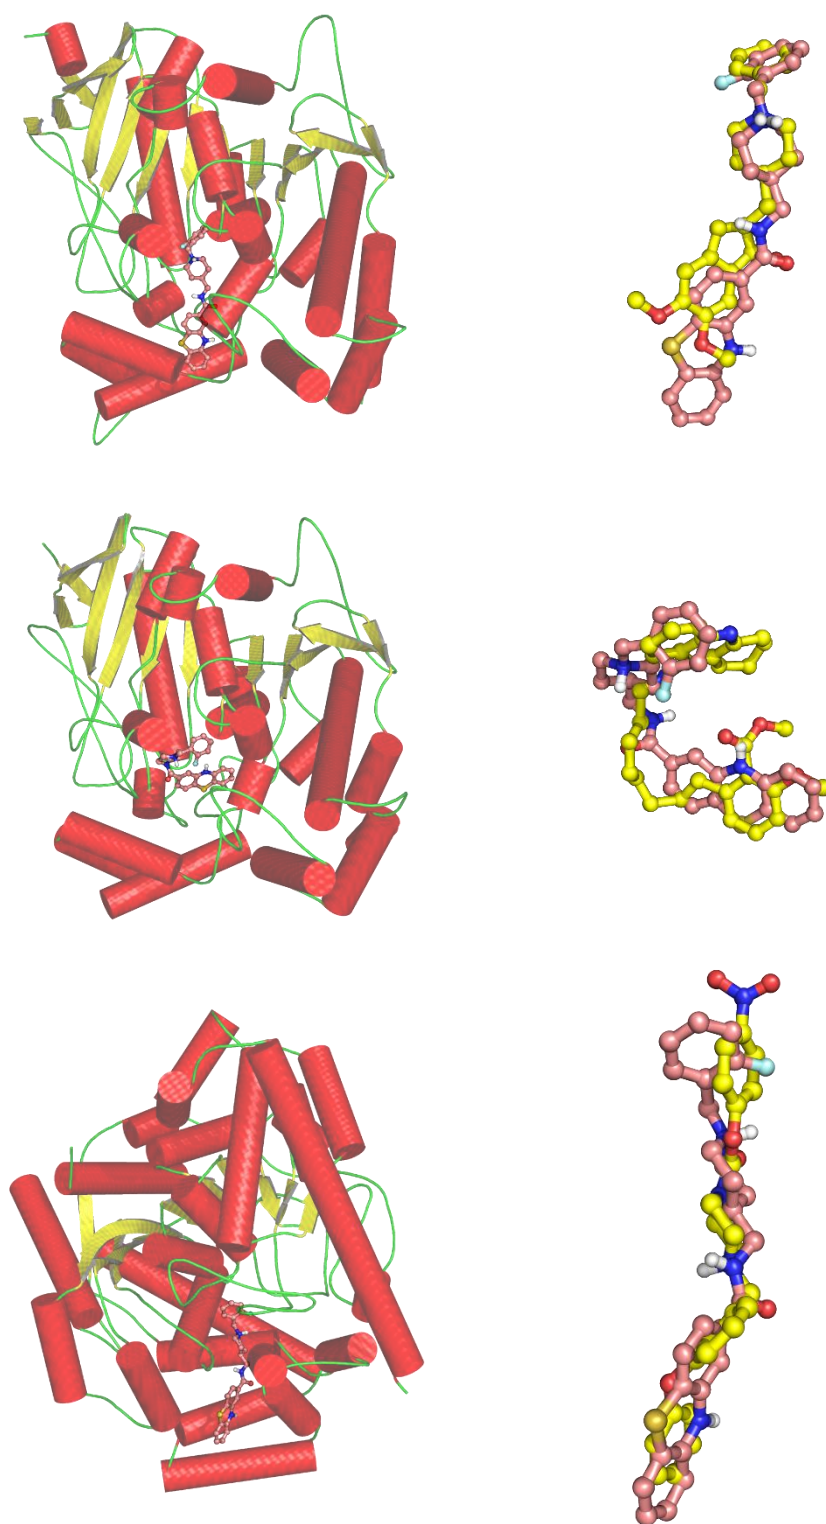

**Figure S3** Overlay of the binding mode of **11d** (salmon carbons) and donepezil, TKN and JZL (yellow carbons) to AChE (top), BChE (center) and FAAH (bottom), respectively.

## ADME prediction

**Table S1.** Physicochemical descriptors and ADME properties of tested compounds **11a-11e**, **12a-12e** and **13** calculated by QIKPROP v. 2.5.

| Compound   | MW <sup>a</sup> | clog <i>P</i> <sup>b</sup> | log BB <sup>c</sup> | P <sub>Caco-2</sub> <sup>d</sup> | Oral Absorp. <sup>e</sup> | CNS act. <sup>f</sup> | Violations Rule of 5 <sup>g</sup> | HBD <sup>h</sup> | HBA <sup>i</sup> | PSA <sup>j</sup> |
|------------|-----------------|----------------------------|---------------------|----------------------------------|---------------------------|-----------------------|-----------------------------------|------------------|------------------|------------------|
| <b>11a</b> | 429.58          | 5.342                      | -0.015              | 552                              | 100                       | +                     | 1                                 | 2.0              | 5.0              | 53.49            |
| <b>11b</b> | 464.02          | 5.71                       | 0.127               | 571                              | 100                       | +                     | 1                                 | 2.0              | 5.0              | 52.01            |
| <b>11c</b> | 443.61          | 5.58                       | 0.008               | 573                              | 100                       | +                     | 1                                 | 2.0              | 5.0              | 51.72            |
| <b>11d</b> | 447.57          | 5.50                       | 0.070               | 562                              | 100                       | +                     | 1                                 | 2.0              | 5.0              | 52.97            |
| <b>11e</b> | 459.60          | 5.44                       | -0.086              | 555                              | 100                       | +                     | 1                                 | 2.0              | 5.75             | 61.30            |
| <b>12a</b> | 444.59          | 4.27                       | 0.288               | 135                              | 100                       | +                     | 0                                 | 2.0              | 7.0              | 59.22            |
| <b>12b</b> | 479.04          | 4.61                       | 0.407               | 134                              | 100                       | +                     | 0                                 | 2.0              | 7.0              | 59.21            |
| <b>12c</b> | 458.62          | 4.49                       | 0.288               | 135                              | 100                       | +                     | 0                                 | 2.0              | 7.0              | 59.02            |
| <b>12d</b> | 462.58          | 4.42                       | 0.360               | 135                              | 100                       | +                     | 0                                 | 2.0              | 7.0              | 59.21            |
| <b>12e</b> | 474.62          | 4.36                       | 0.217               | 135                              | 100                       | +                     | 0                                 | 2.0              | 7.75             | 67.12            |
| <b>13</b>  | 521.08          | 3.91                       | 0.230               | 88                               | 100                       | +                     | 1                                 | 1.0              | 9.50             | 71.81            |

<sup>a</sup>(Acceptable <500); <sup>b</sup> Predicted octanol/water partition coefficient log *P* (acceptable range – 2.0 to 6.5); <sup>c</sup> Predicted BBB permeability (acceptable range – 3 to 1.2); <sup>d</sup> Predicted Caco-2 cell permeability in nm/s (acceptable range: < 25 is poor and > 500 is great); <sup>e</sup> Percentage of human oral absorption (acceptable range: < 25% is poor and > 80% is high); <sup>f</sup> qualitative CNS activity parameter from (--) inactive, (++) active; <sup>g</sup> Number of violations of Lipinski's rule of five; <sup>h</sup> number of hydrogen bond donors HBD; <sup>i</sup> number of hydrogen bond acceptors HBA; <sup>j</sup> polar surface area PSA.
